# Supplementary material for: Porous urchin-like 3D Co(ii)Co(iii) layered double hydroxides for high performance heterogeneous Fenton degradation
Source: Royal Society of Chemistry journal article supplement (doi:10.1039/d0ce01555e), 2020-12-21
Supplement: d0ce01555e1.pdf [file d0ce01555e1.pdf]

## Supplementary Information

### **Porous urchin-like 3D Co(II)Co(III) LDHs for high performance heterogeneous Fenton degradation**

Hira Fazal,<sup>a, b</sup> Asma Iqbal,<sup>a</sup> Yucai Cao,<sup>b</sup> Jiantao Zai\*,<sup>a, b</sup> Nazakat Ali,<sup>a</sup> Yuchi Zhang,<sup>a</sup>  
Xiangyang Wu,<sup>b</sup> Xiwang Zhang\*,<sup>c</sup> and Xuefeng Qian\*<sup>a</sup>

<sup>a</sup> School of Chemistry and Chemical Engineering and State Key Laboratory of Metal Matrix Composites, Shanghai Jiao Tong University, Shanghai, 200240, P.R. China.  
E-mail: zaijiantao@sjtu.edu.cn; Fax: +86-21-54741297; Tel: +86-21-54743262

<sup>b</sup> State Key Laboratory of Polyolefins and Catalysis, Shanghai Key Laboratory of Catalysis Technology for Polyolefin (Shanghai Research Institute of Chemical Industry Co., Ltd., Shanghai).

<sup>c</sup> *Department of Chemical Engineering, Monash University, Wellington Road, Clayton, Victoria 3800, Australia*

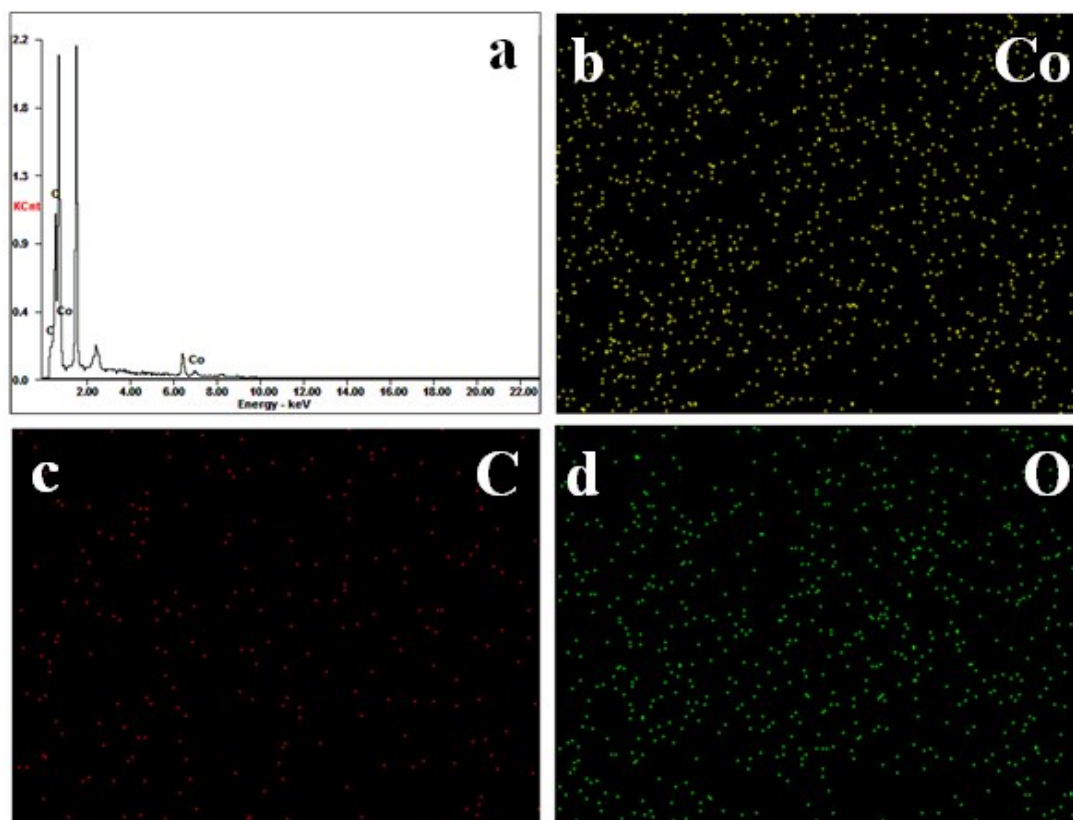

**Fig. S1.** Energy spectra microanalysis micrographs and EDS distribution maps for cobalt, carbon and oxygen in Co(II)Co(III) LDH (CCLH (120)).

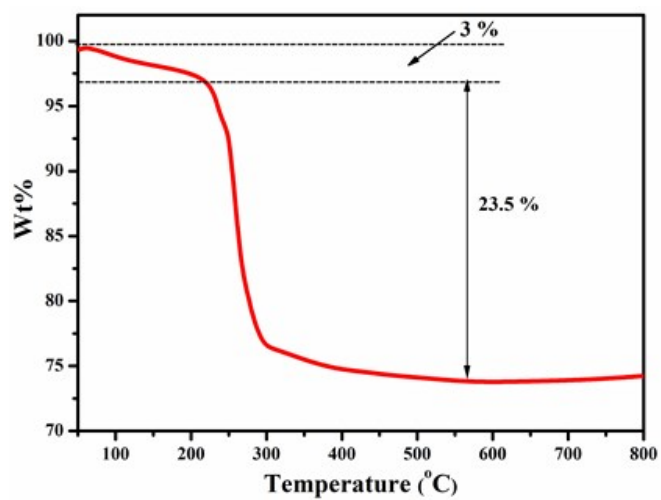

**Fig. S2.** TGA curve of Co(II)Co(III) LDH in air

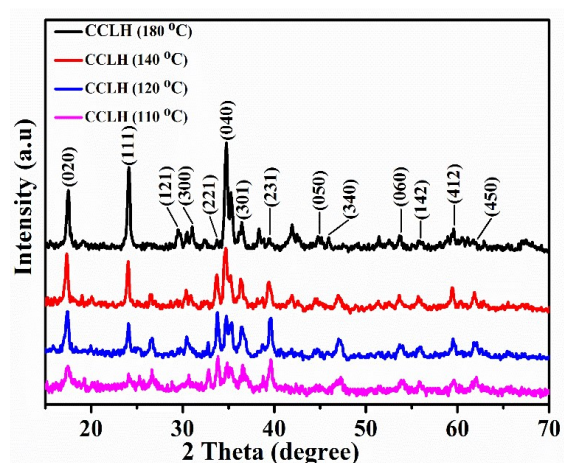

**Fig. S3.** XRD patterns of the prepared Co(II)Co(III) LDHs.

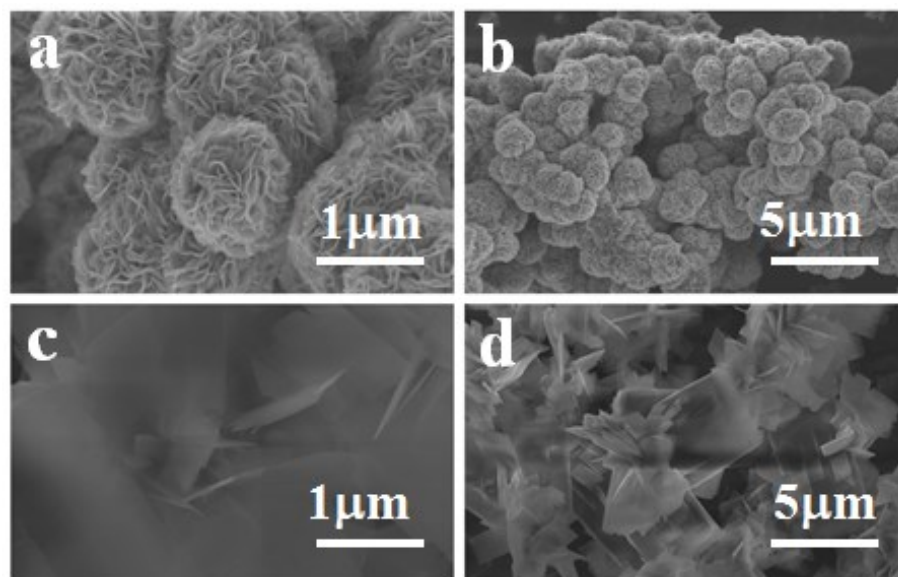

**Fig. S4.** SEM images of Co(II)Co(III) LDHs synthesized by using (a, b) water and (c, d) n-butanol as a solvent.

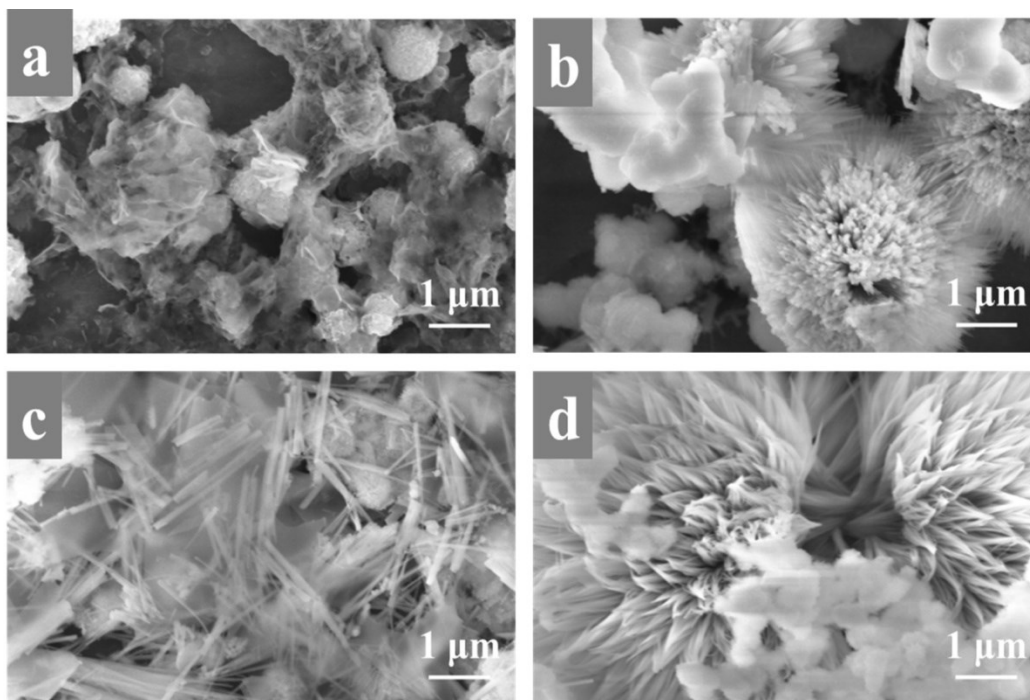

**Fig. S5.** SEM images of Co(II)Co(III) LDHs synthesized at different reaction time (a) 0.5 h, (b) 1h, (c) 3h, (d) 6h.

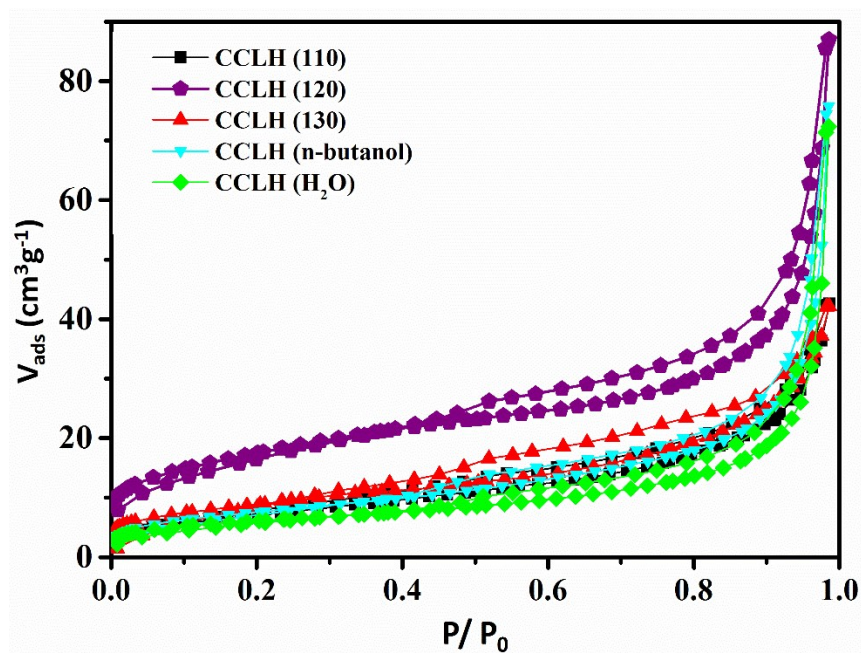

**Fig. S6.** BET N<sub>2</sub> adsorption–desorption isotherms of the prepared Co(II)Co(III) LDHs.

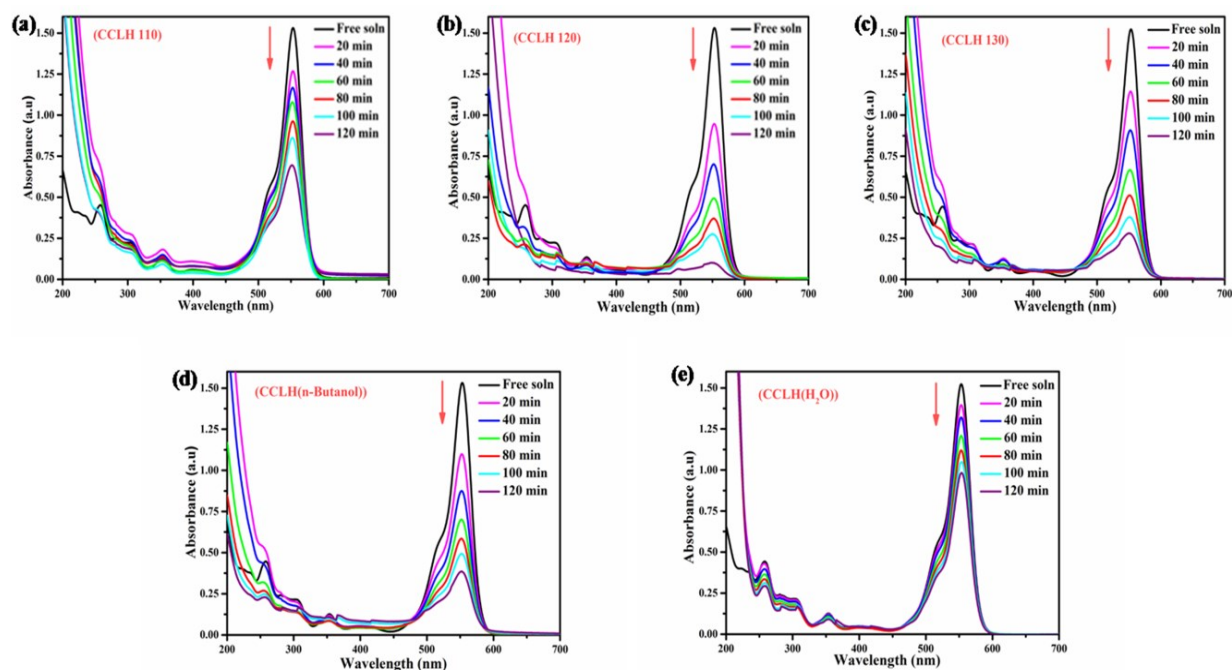

**Fig. S7.** UV–visible absorption spectra of fenton degradation of RhB at different durations with the addition of 40  $\mu\text{L}$   $\text{H}_2\text{O}_2$  and 4mg Co(II)Co(III) LDH at its original pH (a) CCLH(110°C) (b) CCLH(120°C) (c) CCLH(130°C) (d) CCLH(only n-Butanol) (e) CCLH(only  $\text{H}_2\text{O}$ ).

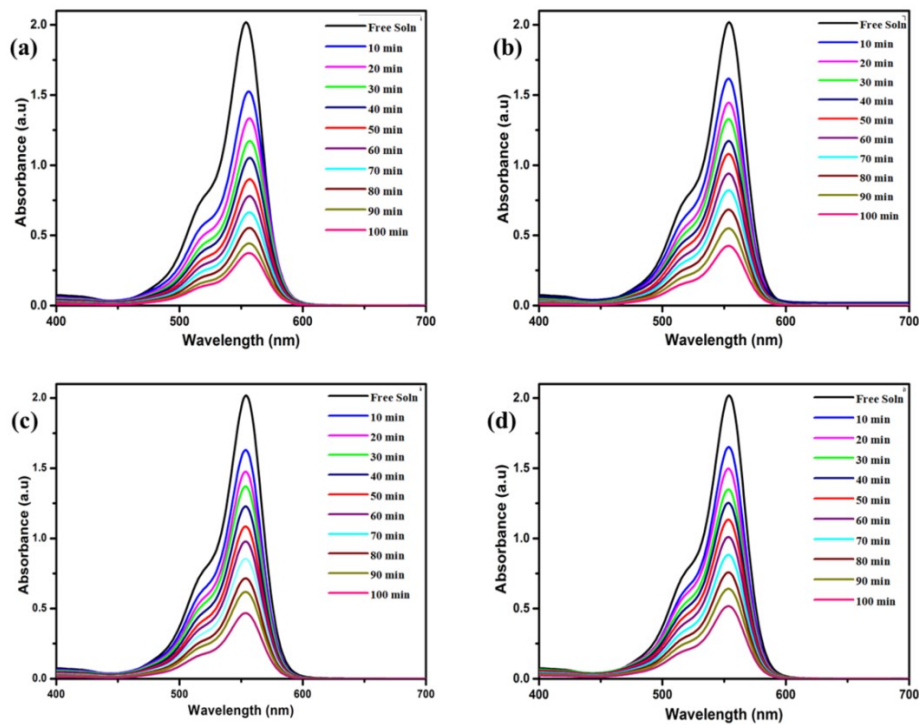

**Fig. S8.** UV–visible absorption spectra of pH effect on degradation efficiency of catalyst (a) pH 3 (b) pH 4 (c) pH 5 (d) pH 6.

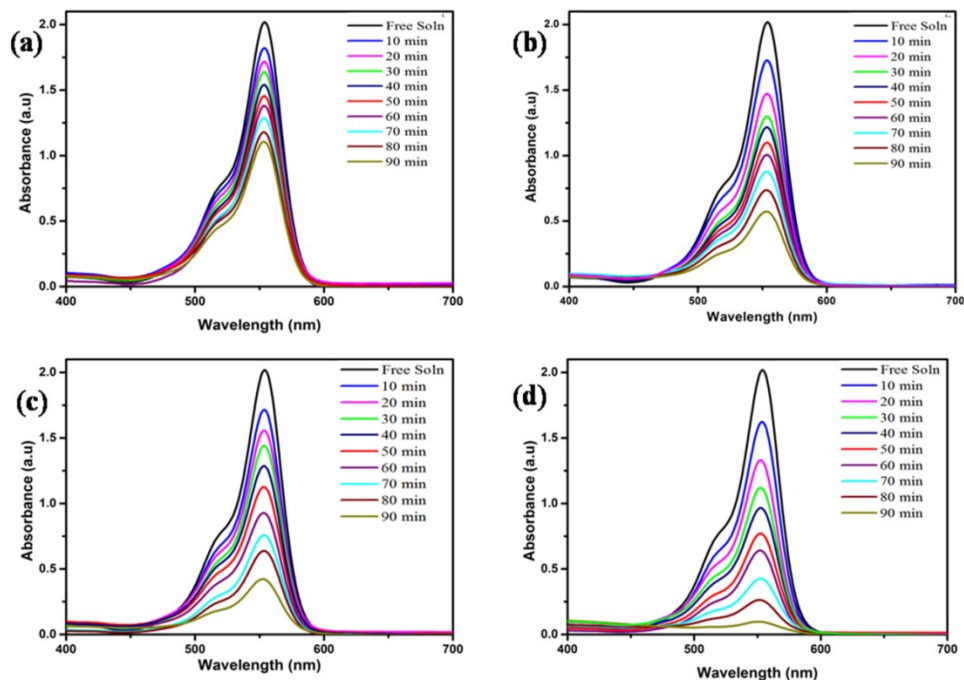

**Fig. S9.** UV-visible absorption spectra of effect of  $\text{H}_2\text{O}_2$  dosage on degradation efficiency of catalyst (a) 20  $\mu\text{L}$  (b) 40  $\mu\text{L}$  (c) 50  $\mu\text{L}$  (d) 60  $\mu\text{L}$ .

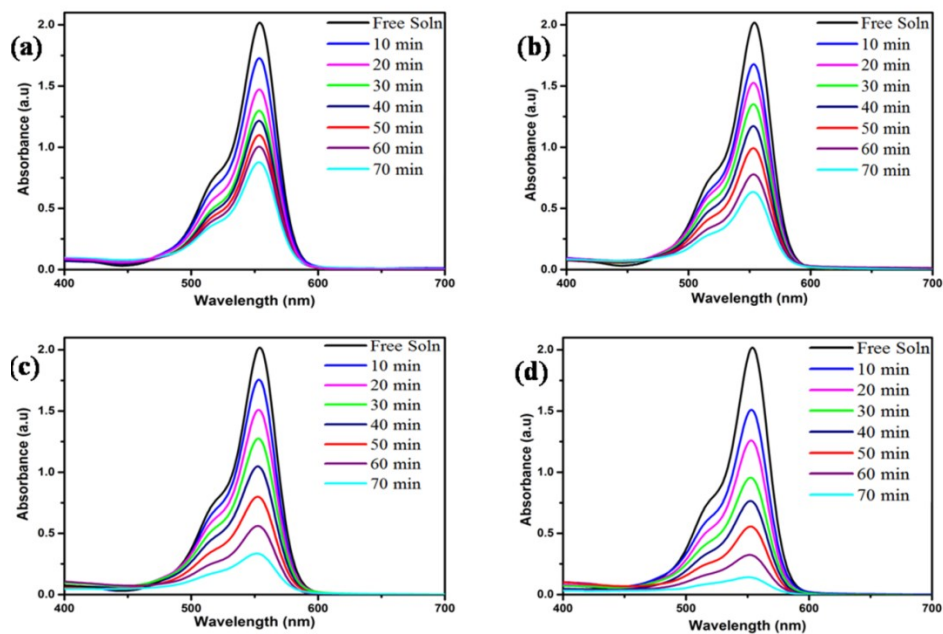

**Fig. S10.** UV-visible absorption spectra of effect of an amount of catalyst on degradation of RhB (a) 4 mg (b) 5 mg, (c) 6 mg (d) 7 mg.

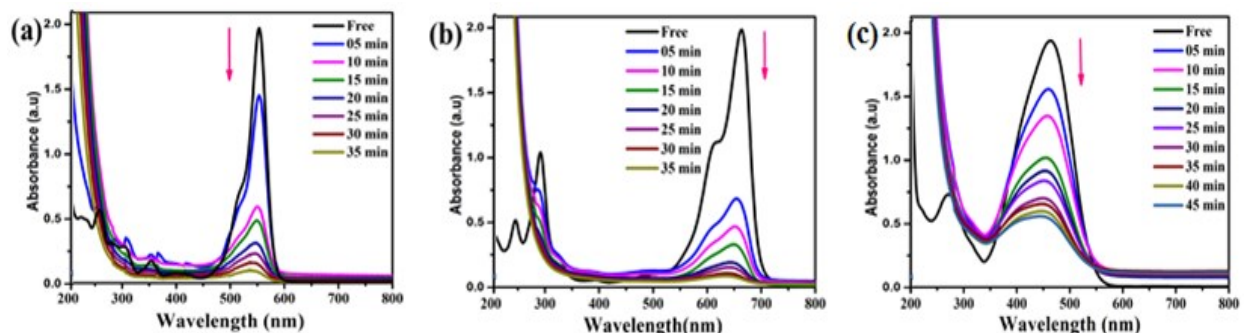

**Fig. S11.** UV–visible absorption spectra of fenton degradation of different dyes (a) RhB, (b) MB, (c) MO at different durations with the addition of 60  $\mu\text{L}$   $\text{H}_2\text{O}_2$  and 5mg (CCLH 120).

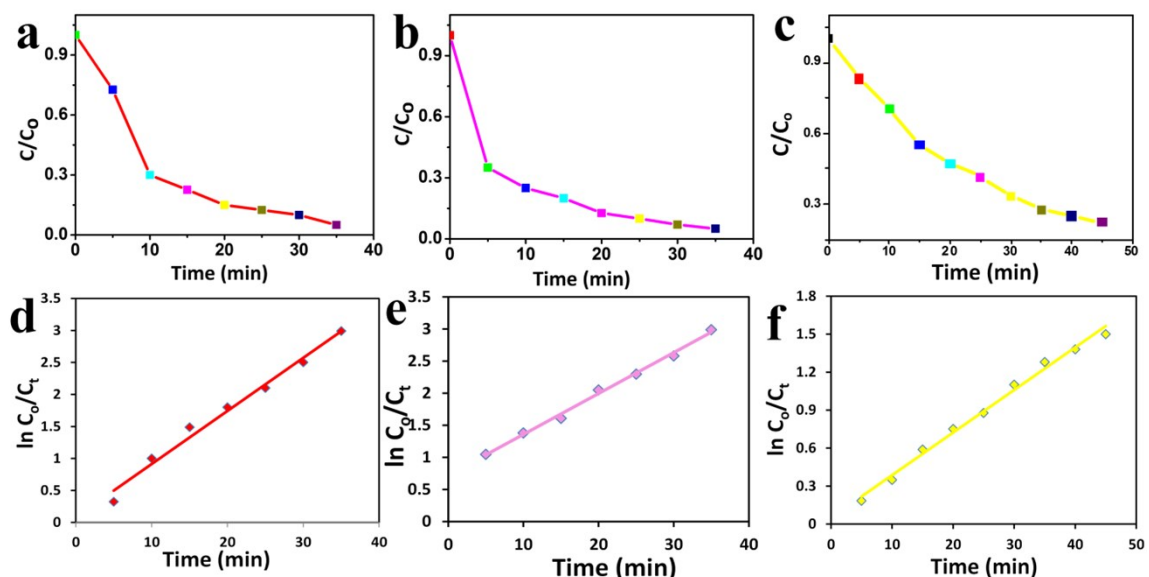

**S12.** Fenton degradation of various dyes (a,b RhB), (c,d MB), (e,f MO) at different durations with the addition of 60  $\mu\text{L}$   $\text{H}_2\text{O}_2$  and 5 mg (CCLH 120) following the pseudo-first order kinetics.

**Table S1:** Description of RhB degraded at different time intervals and calculations of rate constants for different Co(II)Co(III) LDHs.

| Co LDH synthesized | Degradation time(min) | Percentage of dye degraded | Rate Constants ( $\text{min}^{-1}$ ) |
|--------------------|-----------------------|----------------------------|--------------------------------------|
| CCLH (110°C)       | 20                    | 16                         | $6.20 \times 10^{-3}$                |
|                    | 60                    | 22                         |                                      |
|                    | 120                   | 54                         |                                      |

|                         |     |    |                       |
|-------------------------|-----|----|-----------------------|
| CCLH (120°C)            | 20  | 37 | $5.16 \times 10^{-2}$ |
|                         | 60  | 68 |                       |
|                         | 120 | 95 |                       |
| CCLH (130°C)            | 20  | 34 | $3.53 \times 10^{-2}$ |
|                         | 60  | 54 |                       |
|                         | 120 | 75 |                       |
| CCLH (n-Butanol)        | 20  | 34 | $1.15 \times 10^{-2}$ |
|                         | 60  | 54 |                       |
|                         | 120 | 75 |                       |
| CCLH (H <sub>2</sub> O) | 20  | 8  | $3.50 \times 10^{-3}$ |
|                         | 60  | 24 |                       |
|                         | 120 | 36 |                       |

**Table S2:** Description of degradation efficiencies of CCLH (120) for different dyes at different time intervals.

| Degradation time(min) | Percentage of RhB degraded | Percentage of MB degraded | Percentage of MO degraded |
|-----------------------|----------------------------|---------------------------|---------------------------|
| 05                    | 27                         | 67                        | 22                        |
| 10                    | 70                         | 77.3                      | 34                        |
| 35                    | 95                         | 97                        | 77                        |

**Table S3:** Calculations of rate constants and wavelength maxima shift for different dyes using CCLH (120).

| Dyes | Rate Constants (min <sup>-1</sup> ) |
|------|-------------------------------------|
| RhB  | $8.40 \times 10^{-2}$               |
| MB   | $8.64 \times 10^{-2}$               |
| MO   | $3.94 \times 10^{-2}$               |
